# Supplementary material for: Effects of antibiotic duration on the intestinal microbiota and resistome: The PIRATE RESISTANCE project, a cohort study nested within a randomized trial
Source: PubMed Central journal article supplement — eBioMedicine. 2021 Sep 4;71:103566. doi: 10.1016/j.ebiom.2021.103566 (PMC8426194; doi:10.1016/j.ebiom.2021.103566), 2021-09-04
Supplement: mmc3.pdf [file mmc3.pdf]

Dr Shawna McCallin  
Clinical Coordinator  
Balgrist University Hospital, University of Zürich  
Forchstrasse 340  
8008 Zürich  
Tel: +41 79 791 95 43  
Shawna.mccallin@balgrist.ch

Dr Dan Stuckey  
MBiochem, MRes, PhD  
Deputy Editor  
*EBioMedicine*  
Tel.: +44 (0) 7471 142297  
125 London Wall, London EC2Y 5AS, UK

Dear Dr Stuckey,

Herewith I would like to provide a written consent for the citation of my name “Shawna McCallin” in the Acknowledgement section of the present manuscript “Effects of antibiotic duration on the intestinal microbiota and resistome: the PIRATE RESISTANCE project, a cohort study nested within a randomized trial” by S. Leo and co-authors which will be published in your journal *EBioMedicine* after acceptance.

With kind regards,

Shawna McCallin

A handwritten signature in black ink, appearing to be 'SM', with a long, thin vertical stroke extending downwards from the end of the signature.

Dr Dan Stuckey  
MBiochem, MRes, PhD  
Deputy Editor  
*EBioMedicine*  
Tel.: +44 (0) 7471 142297  
125 London Wall, London EC2Y 5AS, UK

Dear Dr Stuckey,

Herewith I would like to provide a written consent for the citation of my name “Nadia Gaia” in the Acknowledgement section of the present manuscript “Effects of antibiotic duration on the intestinal microbiota and resistome: the PIRATE RESISTANCE project, a cohort study nested within a randomized trial” by S. Leo and co-authors which will be published in your journal *EBioMedicine* after acceptance.

With kind regards,

Nadia Gaia

Signature



Dr Dan Stuckey  
MBiochem, MRes, PhD  
Deputy Editor  
*EBioMedicine*  
Tel.: +44 (0) 7471 142297  
125 London Wall, London EC2Y 5AS, UK

Dear Dr Stuckey,

Herewith I would like to provide a written consent for the citation of my name “Name Surname” in the Acknowledgement section of the present manuscript “Effects of antibiotic duration on the intestinal microbiota and resistome: the PIRATE RESISTANCE project, a cohort study nested within a randomized trial” by S. Leo and co-authors which will be published in your journal *EBioMedicine* after acceptance.

With kind regards,

Name Surname

Myriam GIRARD

Signature

A handwritten signature in blue ink, appearing to be 'Myriam Girard', written over a horizontal line.

Dr Dan Stuckey  
MBiochem, MRes, PhD  
Deputy Editor  
*EBioMedicine*  
Tel.: +44 (0) 7471 142297  
125 London Wall, London EC2Y 5AS, UK

Dear Dr Stuckey,

Herewith I would like to provide a written consent for the citation of my name "Name Surname" in the Acknowledgement section of the present manuscript "Effects of antibiotic duration on the intestinal microbiota and resistome: the PIRATE RESISTANCE project, a cohort study nested within a randomized trial" by S. Leo and co-authors which will be published in your journal *EBioMedicine* after acceptance.

With kind regards,

Name Surname WYNAR CORDIER DONATIENNE

Signature

A handwritten signature in black ink, appearing to be 'WYNAR CORDIER DONATIENNE', written over a horizontal line.
